# Supplementary material for: A continent-wide high genetic load in African buffalo revealed by clines in the frequency of deleterious alleles, genetic hitchhiking and linkage disequilibrium
Source: PLoS One. 2021 Dec 9;16(12):e0259685. doi: 10.1371/journal.pone.0259685 (PMC8659316; doi:10.1371/journal.pone.0259685)
Supplement: S4 Table — (CSV) [file pone.0259685.s005.csv]

Population/p-MDTA frequencies	Latitude	BM3517	BM4028	ETH010	ETH225	INRA006	INRA128	TGLA227	TGLA263	BM719	BM3205	CSSM019	DIK020	ILSTS026	SPS115	TGLA57	TGLA159	BM1824
Bénoué NP/Lopé NP	4.798	0.4	0.4			0.1	0.6		0.4	0	0	0.5	0.1	0.3		0.1	0.1
Kidepo Valley NP	3.85	0.552631579	0.631578947				0.868421053			0.083333333	0.368421053	0.105263158	0.052631579	0.263157895		0.184210526	0.222222222
Murchison Falls NP	2.15	0.366666667	0.433333333				0.733333333			0.033333333	0.5	0.233333333	0.266666667	0.2		0.321428571	0.166666667
Laikipia NP	0.4	0.735294118	0.294117647				0.588235294			0.235294118	0.264705882	0.088235294	0.205882353	0.088235294		0.323529412	0.352941176
Queen Elizabeth NP Mw	-0.06	0.527027027	0.675675676				0.891891892			0.067567568	0.256756757	0.121621622	0.193548387	0.256756757		0.405405405	0.328571429
Queen Elizabeth NP Is	-0.36	0.235294118	0.558823529				0.941176471			0.029411765	0.235294118	0.235294118	0.117647059	0.029411765		0.470588235	0.441176471
Lake Nakuru NP	-0.4	0.721153846	0.330188679			0.441176471	0.801886792		0.357142857	0.103773585	0.095744681	0.141509434	0.273584906	0.009433962		0.490566038	0.122641509
Lake Mburo NP	-0.58	0.866666667	0.433333333				0.966666667			0	0.366666667	0.066666667	0.333333333	0.3		0.333333333	0.2
Nairobi NP	-1.36	0.236842105	0.052631579				0.789473684			0.184210526	0.315789474	0	0.026315789	0		0.184210526	0.078947368
Masai Mara GR	-1.47	0.697674419	0.302325581			0.5	0.639534884		0.4	0.069767442	0.302325581	0.154761905	0.1875	0.023255814		0.395348837	0.273809524
Serengeti NP‡	-2.2	0.642857143	0.557142857	0.479166667		0.457142857	0.632352941		0.5	0.1	0.191176471	0.140625	0.272727273	0.128571429	0.180851064	0.220588235	0.191176471	0.329545455
Amboseli NP	-2.6	0.666666667	0.538461538			0.131578947	0.846153846		0.289473684	0.157894737	0.666666667	0.128205128	0.184210526	0.102564103		0.486842105	0.282051282
Tsavo NP	-2.7	0.625	0.555555556			0.1875	0.5		0.444444444	0	0.4375	0.125	0.214285714	0		0.444444444	0.285714286
Niassa Reserve	-12.25		0.85	0.75	0.45	0.325	0.825	0.975	0.3			0.175	0.325	0.05	0.075			0.131578947
Mana Pools NP/Nyakasanga	-15.96666667		0.958333333	0.958333333	0.5	0.25	0.727272727	0.75	0.166666667			0.333333333	0.041666667	0.291666667	0.291666667			0.272727273
Victoria Falls NP	-17.97		0.933333333	0.833333333	0.8	0.266666667	0.666666667	0.966666667	0.2			0.566666667	0.033333333	0.466666667	0.266666667			0.566666667
Caprivi Strip	-18.1	0.798507463														0.384328358
Chobe NP	-18.45		0.954545455	0.818181818	0.613636364	0.386363636	0.840909091	0.909090909	0.295454545			0.454545455	0.045454545	0.386363636	0.380952381			0.526315789
Gorongosa NP	-18.8		0.857142857	0.571428571	0.571428571	0.571428571	0.714285714	1	0.5			0.571428571	0	0.214285714	0.142857143			0.583333333
Marromeu GR	-18.85		0.761904762	0.904761905	0.571428571	0.595238095	0.80952381	0.976190476	0.238095238			0.19047619	0.394736842	0.119047619	0.166666667			0.380952381
Hwange NP	-19.2		1	0.916666667	0.666666667	0.416666667	0.583333333	0.833333333	0.166666667			0.583333333	0.083333333	0.5	0.25			0.6
Okavango Delta	-19.3		0.9	0.921052632	0.675	0.225	0.775	0.925	0.275			0.425	0.025	0.25	0.236842105			0.210526316
Save Valley Conservancy	-19.43	0.928571429	0.95			0.4	0.6		0.45	0.15	0.25	0.55	0.2	0.45		0.3	0.25
Malilangwe Wildlife Res.	-21		0.825	0.925	0.725	0.325	0.625	0.95	0.5			0.5	0.125	0.325	0.25			0.325
Gonarezhou NP	-21.65		0.964285714	0.880952381	0.619047619	0.487804878	0.609756098	0.892857143	0.619047619			0.428571429	0.205882353	0.238095238	0.292682927			0.580645161
Sengwe Safari Area	-22.3		0.875	1	0.375	0.375	0.75	0.8125	0.75			0.4375	0.0625	0.4375	0.125			0.3125
Crooks corner	-22.42		0.923076923	0.769230769	0.576923077	0.730769231	0.846153846	0.846153846	0.541666667			0.538461538	0.307692308	0.384615385	0.269230769			0.307692308
Limpopo NP	-23.25		0.666666667	1	0.583333333	0.416666667	0.916666667	0.75	0.416666667			0.416666667	0.25	0.416666667	0.5			0.2
Manguana	-24.9		0.75	0.875	0.75	0.625	0.625	0.75	0.75			0.875	0	0.125	0.125			0.833333333
Northern KNP	-23.15	0.84591195	0.883152174	0.796875	0.680379747	0.53021978	0.693989071	0.873417722	0.580645161	0.243589744	0.531446541	0.535714286	0.233727811	0.338709677	0.251533742	0.509493671	0.361842105	0.5
Southern KNP	-24.75	0.841945289	0.913897281	0.851735016	0.678456592	0.634441088	0.799401198	0.883870968	0.637313433	0.23465704	0.565151515	0.576807229	0.321766562	0.307443366	0.20754717	0.531722054	0.360544218	0.484025559
HiP	-28.22	0.582687339	0.71291866	0.690023753	0.937054632	0.027511962	0.973747017	0.693548387	0.395238095	0.113941019	0.065326633	0.331339713	0	0.099756691	0.037170264	0	0.24556962	0.005938242
Population/p-wildtype frequencies
frequencies	latitude	BM3517	BM4028	ETH010	ETH225	INRA006	INRA128	TGLA227	TGLA263	BM719	BM3205	CSSM019	DIK020	ILSTS026	SPS115	TGLA57	TGLA159	BM1824
Bénoué NP/Lopé NP	4.798	0.1	0			0.1	0		0.1	0.2	0.5	0	0.5	0.2		0.6	0.5
Kidepo Valley NP	3.85	0.026315789	0				0.026315789			0.333333333	0.342105263	0.263157895	0	0.394736842		0.657894737	0.416666667
Murchison Falls NP	2.15	0.233333333	0				0.266666667			0.466666667	0.366666667	0.266666667	0.066666667	0.366666667		0.392857143	0.466666667
Laikipia NP	0.4	0	0				0			0.441176471	0.441176471	0.294117647	0	0.470588235		0.588235294	0.558823529
Queen Elizabeth NP Mw	-0.06	0.121621622	0				0.040540541			0.175675676	0.418918919	0.121621622	0.193548387	0.175675676		0.283783784	0.414285714
Queen Elizabeth NP Is	-0.36	0.058823529	0				0			0.558823529	0.382352941	0.058823529	0.323529412	0.647058824		0.235294118	0.323529412
Lake Nakuru NP	-0.4	0.086538462	0			0.455882353	0		0.2	0.273584906	0.563829787	0.264150943	0.075471698	0.405660377		0.311320755	0.518867925
Lake Mburo NP	-0.58	0.066666667	0				0.033333333			0.466666667	0.333333333	0.133333333	0.1	0.366666667		0.633333333	0.533333333
Nairobi NP	-1.36	0.157894737	0				0.026315789			0.131578947	0.552631579	0.236842105	0.026315789	0.473684211		0.315789474	0.631578947
Masai Mara GR	-1.47	0.104651163	0			0.35	0.069767442		0.2	0.488372093	0.534883721	0.071428571	0.025	0.38372093		0.337209302	0.30952381
Serengeti NP‡	-2.2	0.071428571	0	0.270833333		0.328571429	0.117647059		0.257575758	0.314285714	0.529411765	0.1875	0.060606061	0.285714286	0.255319149	0.602941176	0.441176471	0.102272727
Amboseli NP	-2.6	0.076923077	0			0.184210526	0.038461538		0.5	0.460526316	0.152777778	0.371794872	0.039473684	0.282051282		0.447368421	0.628205128
Tsavo NP	-2.7	0	0			0.4375	0		0.333333333	0.625	0.4375	0.375	0.142857143	0.5625		0.388888889	0.714285714
Niassa Reserve	-12.25		0.05	0.25	0.55	0.15	0.1	0	0.575			0.3	0.075	0.675	0.3			0.131578947
Mana Pools NP/Nyakasanga	-15.96666667		0.041666667	0	0.5	0.416666667	0.181818182	0.041666667	0.333333333			0.291666667	0.25	0.416666667	0.208333333			0.090909091
Victoria Falls NP	-17.97		0.066666667	0.166666667	0.2	0.2	0.1	0.033333333	0.433333333			0.1	0.3	0.466666667	0.2			0.1
Caprivi Strip	-18.1	0.111940299														0.473880597
Chobe NP	-18.45		0.045454545	0.181818182	0.386363636	0.227272727	0.022727273	0.045454545	0.431818182			0.159090909	0.272727273	0.409090909	0.142857143			0.131578947
Gorongosa NP	-18.8		0.071428571	0.428571429	0.428571429	0.285714286	0.214285714	0	0.357142857			0.285714286	0.333333333	0.714285714	0.428571429			0
Marromeu GR	-18.85		0	0.095238095	0.428571429	0.142857143	0.19047619	0.023809524	0.714285714			0.166666667	0.289473684	0.619047619	0.119047619			0.214285714
Hwange NP	-19.2		0	0.083333333	0.333333333	0.416666667	0.333333333	0	0.583333333			0	0.25	0.333333333	0.166666667			0
Okavango Delta	-19.3		0.05	0.078947368	0.325	0.375	0.05	0.075	0.5			0.05	0.35	0.475	0.210526316			0.263157895
Save Valley Conservancy	-19.43	0	0.05			0.35	0.25		0.5	0.55	0.35	0.25	0.2	0.35		0.55	0.5
Malilangwe Wildlife Res.	-21		0.075	0.075	0.275	0.525	0.15	0.025	0.45			0.1	0.375	0.35	0.275			0.175
Gonarezhou NP	-21.65		0	0.119047619	0.380952381	0.390243902	0.182926829	0.023809524	0.273809524			0.166666667	0.455882353	0.55952381	0.329268293			0.129032258
Sengwe Safari Area	-22.3		0.125	0	0.625	0.5	0.125	0.0625	0.25			0.3125	0.375	0.5625	0.5			0.0625
Crooks corner	-22.42		0	0.230769231	0.423076923	0.269230769	0.153846154	0.076923077	0.416666667			0.230769231	0.269230769	0.423076923	0.5			0.038461538
Limpopo NP	-23.25		0.25	0	0.416666667	0.583333333	0.083333333	0.083333333	0.583333333			0.333333333	0.583333333	0.5	0.416666667			0
Manguana	-24.9		0	0.125	0.25	0.25	0.375	0.125	0.25			0	0.5	0.5	0.25			0
Northern KNP	-23.15	0.072327044	0.059782609	0.190625	0.319620253	0.357142857	0.193989071	0.07278481	0.319892473	0.551282051	0.273584906	0.258241758	0.366863905	0.518817204	0.441717791	0.446202532	0.539473684	0.093548387
Southern KNP	-24.75	0.100303951	0.067975831	0.146687697	0.319935691	0.287009063	0.131736527	0.085483871	0.298507463	0.624548736	0.268181818	0.256024096	0.384858044	0.585760518	0.556603774	0.422960725	0.547619048	0.169329073
HiP	-28.22	0.051679587	0.259569378	0.309976247	0.062945368	0.801435407	0.026252983	0.306451613	0.455952381	0.329758713	0.484924623	0.642344498	0.826506024	0.900243309	0.45323741	0.675062972	0.721518987	0.306413302
Population/# observed	latitude	BM3517	BM4028	ETH010	ETH225	INRA006	INRA128	TGLA227	TGLA263	BM719	BM3205	CSSM019	DIK020	ILSTS026	SPS115	TGLA57	TGLA159	BM1824
Bénoué NP/Lopé NP	4.798	10	10			10	10		10	10	10	10	10	10		10	10
Kidepo Valley NP	3.85	38	38				38			36	38	38	38	38		38	36
Murchison Falls NP	2.15	30	30				30			30	30	30	30	30		28	30
Laikipia NP	0.4	34	34				34			34	34	34	34	34		34	34
Queen Elizabeth NP Mw	-0.06	74	74				74			74	74	74	62	74		74	70
Queen Elizabeth NP Is	-0.36	34	34				34			34	34	34	34	34		34	34
Lake Nakuru NP	-0.4	104	106			68	106		70	106	94	106	106	106		106	106
Lake Mburo NP	-0.58	30	30				30			30	30	30	30	30		30	30
Nairobi NP	-1.36	38	38				38			38	38	38	38	38		38	38
Masai Mara GR	-1.47	86	86			20	86		20	86	86	84	80	86		86	84
Serengeti NP‡	-2.2	70	70	96		70	68		66	70	68	64	66	70	94	68	68	88
Amboseli NP	-2.6	78	78			38	78		38	76	72	78	76	78		76	78
Tsavo NP	-2.7	16	18			16	16		18	16	16	16	14	16		18	14
Niassa Reserve	-12.25		40	40	40	40	40	40	40			40	40	40	40			38
Mana Pools NP/Nyakasanga	-15.96666667		24	24	24	24	22	24	24			24	24	24	24			22
Victoria Falls NP	-17.97		30	30	30	30	30	30	30			30	30	30	30			30
Caprivi Strip	-18.1	268														268
Chobe NP	-18.45		44	44	44	44	44	44	44			44	22	44	42			38
Gorongosa NP	-18.8		14	14	14	14	14	14	14			14	12	14	14			12
Marromeu GR	-18.85		42	42	42	42	42	42	42			42	38	42	42			42
Hwange NP	-19.2		12	12	12	12	12	12	12			12	12	12	12			10
Okavango Delta	-19.3		40	38	40	40	40	40	40			40	40	40	38			38
Save Valley Conservancy	-19.43	14	20			20	20		20	20	20	20	20	20		20	16
Malilangwe Wildlife Res.	-21		40	40	40	40	40	40	40			40	40	40	40			40
Gonarezhou NP	-21.65		84	84	84	82	82	84	84			84	68	84	82			62
Sengwe Safari Area	-22.3		16	16	16	16	16	16	16			16	16	16	16			16
Crooks corner	-22.42		26	26	26	26	26	26	24			26	26	26	26			26
Limpopo NP	-23.25		12	12	12	12	12	12	12			12	12	12	12			10
Manguana	-24.9		8	8	8	8	8	8	8			8	8	8	8			6
Northern KNP	-23.15	318	368	320	316	364	366	316	372	312	318	364	338	372	326	316	304	310
Southern KNP	-24.75	658	662	634	622	662	668	620	670	554	660	664	634	618	636	662	588	626
HiP	-28.22	774	836	842	842	836	838	806	840	746	796	836	830	822	834	794	790	842
